# Supplementary material for: Management of metabolic syndrome by nutraceuticals prepared from chitosan and ferulic acid with or without beta-sitosterol and their nanoforms
Source: PubMed Central journal article supplement (PMC10374579; doi:10.1038/s41598-023-38837-9), 2023-07-27
Supplement: 41598_2023_38837_MOESM1_ESM.pdf [file 41598_2023_38837_MOESM1_ESM.pdf]

Supplementary tables

**Table (1): FT-IR peaks position and intensity of Chitosan**

| No. | Position | Intensity |
|-----|----------|-----------|
| 1   | 3431.71  | 27.8202   |
| 2   | 2922.59  | 36.4032   |
| 3   | 2870.52  | 37.2548   |
| 4   | 1655.59  | 45.1007   |
| 5   | 1601.59  | 47.3692   |
| 6   | 1422.24  | 51.869    |
| 7   | 1379.82  | 50.5166   |
| 8   | 1320.04  | 54.34     |
| 9   | 1255.43  | 60.4312   |
| 10  | 1156.12  | 51.4823   |
| 11  | 1032.69  | 50.3304   |
| 12  | 897.701  | 64.4457   |
| 13  | 563.112  | 63.5834   |
| 14  | 445.476  | 71.5945   |
| 15  | 415.585  | 69.9451   |

**Table (2): FT-IR peaks position and intensity of ferulic acid**

| No | Position | Intensity |
|----|----------|-----------|
| 1  | 3427.85  | 58.4577   |
| 2  | 2939.95  | 34.328    |
| 3  | 1639.2   | 85.1584   |
| 4  | 1461.78  | 63.3565   |
| 5  | 1375.96  | 66.9863   |
| 6  | 1243.86  | 88.0212   |
| 7  | 1188.9   | 88.189    |
| 8  | 1132.97  | 86.2766   |
| 9  | 1050.05  | 68.6943   |
| 10 | 956.52   | 85.8798   |
| 11 | 837.919  | 89.2023   |
| 12 | 801.278  | 87.2083   |
| 13 | 568.898  | 82.9745   |
| 14 | 489.831  | 84.1725   |
| 15 | 457.047  | 84.2922   |
| 16 | 412.692  | 90.2694   |

**Table (3): FT-IR peaks position and intensity of  $\beta$ -sitosterol**

| No | Position | Intensity |
|----|----------|-----------|
| 1  | 3442.31  | 6.15534   |
| 2  | 2934.16  | 8.71692   |
| 3  | 2098.17  | 70.9726   |
| 4  | 1966.07  | 72.5725   |
| 5  | 1715.62  | 36.0173   |
| 6  | 1641.13  | 18.5229   |
| 7  | 1518.67  | 31.7074   |
| 8  | 1466.6   | 20.3642   |
| 9  | 1377.89  | 23.7938   |
| 10 | 1353.78  | 24.4709   |
| 11 | 1283.39  | 32.5668   |
| 12 | 1252.54  | 31.0243   |
| 13 | 1102.12  | 4.95832   |
| 14 | 987.375  | 74.0764   |
| 15 | 951.098  | 32.654    |
| 16 | 838.883  | 57.6288   |
| 17 | 806.099  | 70.1431   |
| 18 | 778.136  | 77.7093   |
| 19 | 566.969  | 43.0324   |

**Table (4): FT-IR peaks position and intensity of Chitosan/Ferulic acid**

| No | Position | Intensity |
|----|----------|-----------|
| 1  | 3433.64  | 14.5982   |
| 2  | 2910.06  | 21.615    |
| 3  | 2834.85  | 21.3871   |
| 4  | 2662.25  | 24.8395   |
| 5  | 2588     | 23.7529   |
| 6  | 1826     | 81.0175   |
| 7  | 1680.66  | 7.59661   |
| 8  | 1606.41  | 5.76698   |
| 9  | 1511.92  | 7.64936   |
| 10 | 1423.21  | 9.05802   |
| 11 | 1272.79  | 3.27993   |
| 12 | 1172.51  | 3.49947   |
| 13 | 1030.77  | 15.7312   |
| 14 | 937.235  | 9.88745   |
| 15 | 851.418  | 22.3864   |
| 16 | 802.242  | 25.7434   |
| 17 | 749.209  | 46.7596   |
| 18 | 685.57   | 46.1658   |
| 19 | 570.826  | 15.0868   |
| 20 | 515.865  | 23.3254   |

**Table (5): FT-IR peaks position and intensity of Chitosan/Ferulic acid /  $\beta$ -sitosterol.**

| No | Position | Intensity |
|----|----------|-----------|
| 1  | 3427.85  | 33.8855   |
| 2  | 2958.27  | 11.091    |
| 3  | 2937.06  | 10.027    |
| 4  | 2867.63  | 18.0317   |
| 5  | 1665.23  | 70.3621   |
| 6  | 1635.34  | 70.4632   |
| 7  | 1464.67  | 34.9527   |
| 8  | 1379.82  | 36.1795   |
| 9  | 1330.64  | 64.8225   |
| 10 | 1280.5   | 76.898    |
| 11 | 1243.86  | 74.5473   |
| 12 | 1191.79  | 75.7452   |
| 13 | 1133.94  | 72.222    |
| 14 | 1108.87  | 71.3041   |
| 15 | 1047.16  | 39.4286   |
| 16 | 987.375  | 81.3949   |
| 17 | 956.52   | 69.0027   |
| 18 | 925.664  | 86.2739   |
| 19 | 880.345  | 89.4123   |
| 20 | 839.847  | 80.6939   |
| 21 | 801.278  | 76.2458   |
| 22 | 736.674  | 84.4643   |
| 23 | 624.823  | 76.7586   |
| 24 | 592.039  | 76.2652   |
| 25 | 501.401  | 84.9849   |
| 26 | 451.261  | 89.4186   |

**Table: 6. Nutritional parameters of rats fed on balanced and HFFD for two months (First stage).**

| Parameter           | Groups        |              |
|---------------------|---------------|--------------|
|                     | NC            | M            |
| IBW (g)             | 100 ± 5.3     | 100 ± 1.5    |
| FBW(g)              | 207.5 ± 4.4   | 255* ± 1     |
| BWG(g)              | 107.5 ± 2.4   | 155* ± 1.1   |
| TFI(g)              | 749 ± 37.7    | 728 ± 8.8    |
| Food intake (g/day) | 12.5 ± 0.63   | 12.1 ± 0.15  |
| FER                 | 0.144 ± 0.005 | 0.213*±0.003 |

Values are expressed as means± SE (n=8 in NC group, while in M group n= 80), IBW: initial body weight, FBW: final body weight, BWG: body weight gain, TFI: total food intake, FER: food efficiency ratio, M: Rats with metabolic syndrome, NC: Normal control group.\*: Significant difference from NC where  $p < 0.05$  (Student' s t-test).

**Table 7. Pearson's correlation coefficients of the different measured biochemical parameters.**

|           | Glucose | TC       | HDL-C    | Non HDL-C | LDL-C    | TG       | ALT      | AST      | Cr.      | urea     | TAC      | MDA      | Insulin  | Adipon   | hs-CRP | IR |
|-----------|---------|----------|----------|-----------|----------|----------|----------|----------|----------|----------|----------|----------|----------|----------|--------|----|
| Glucose   | 1       |          |          |           |          |          |          |          |          |          |          |          |          |          |        |    |
| TC        | 0.574*  | 1        |          |           |          |          |          |          |          |          |          |          |          |          |        |    |
| HDL-C     | -0.295* | 0.632**  | 1        |           |          |          |          |          |          |          |          |          |          |          |        |    |
| Non HDL-C | 0.570*  | 0.999**  | -0.666** | 1         |          |          |          |          |          |          |          |          |          |          |        |    |
| LDL-C     | 0.556*  | 0.998**  | -0.67*   | 0.99*     | 1        |          |          |          |          |          |          |          |          |          |        |    |
| TG        | 0.702*  | 0.841**  | -0.490** | 0.838**   | 0.82*    | 1        |          |          |          |          |          |          |          |          |        |    |
| ALT       | 0.793*  | 0.555*   | -0.267** | 0.550**   | 0.539**  | 0.650**  | 1        |          |          |          |          |          |          |          |        |    |
| AST       | 0.745*  | 0.769**  | -0.476** | 0.767**   | 0.759**  | 0.773**  | 0.798**  | 1        |          |          |          |          |          |          |        |    |
| Cr.       | 0.712*  | 0.599**  | -0.385** | 0.598**   | 0.591**  | 0.635**  | 0.682**  | 0.731**  | 1        |          |          |          |          |          |        |    |
| Urea      | 0.610*  | 0.759**  | -0.481** | 0.758**   | 0.752**  | 0.728**  | 0.656**  | 0.870**  | 0.608**  | 1        |          |          |          |          |        |    |
| TAC       | -0.585* | -0.758** | 0.414**  | -0.753**  | -0.748** | -0.705** | -0.664** | -0.818** | -0.523** | -0.761** | 1        |          |          |          |        |    |
| MDA       | 0.743*  | 0.832**  | -0.552** | 0.833**   | 0.827**  | 0.795**  | 0.688**  | 0.840**  | 0.655**  | 0.821**  | -0.730** | 1        |          |          |        |    |
| Insulin   | 0.420*  | 0.677**  | -0.426** | 0.677**   | 0.676**  | 0.565**  | 0.534**  | 0.667**  | 0.433**  | 0.620**  | -0.647** | -0.633** | 1        |          |        |    |
| Adipon    | -0.698* | -0.899** | 0.577**  | -0.899**  | -0.896** | -0.795** | -0.658** | -0.839** | -0.695** | -0.809** | 0.731**  | -0.900** | -0.644** | 1        |        |    |
| hs-CRP    | 0.729*  | 0.535**  | -0.376** | 0.537**   | 0.524**  | 0.672**  | 0.652**  | 0.652**  | 0.606**  | 0.642**  | -0.476** | 0.694**  | 0.332**  | -0.612** | 1      |    |
| IR        | 0.891*  | 0.719**  | -0.408** | 0.716**   | 0.707**  | 0.753**  | 0.803**  | 0.83*    | 0.704**  | 0.718**  | -0.698** | 0.817**  | 0.781**  | -0.789** | 0.66** | 1  |

\*: Significant at p<0.05, \*\*: Significant at p<0.01, -: Means negative correlation, no sign: Means positive correlation

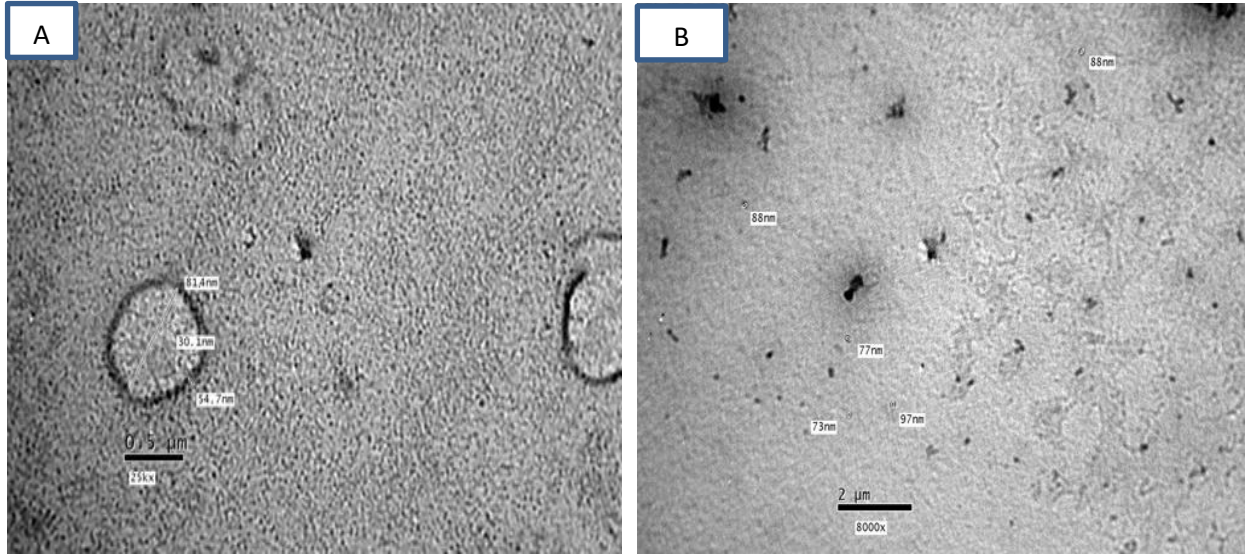

**Figure 1: Particle size by Transmission electron microscopy (TEM).** A: TEM of Chitosan/ Ferulic acid, B: TEM of Chitosan/Ferulic acid /  $\beta$ -sitosterol
